# Supplementary material
Source: publisher figshare collection journal article supplement (https://gsajournals.figshare.com/ndownloader/files/13477049)
Supplement: Supplementary file 1 [file 13477049]

## Sheet: Sheet1
Table S4. Significant marker-trait associations obtained in the GWAS of resistance to wheat stripe rust.
Chromosome Arm	SNP_left_boundary (a)	SNP_right_boundary (a)	Phenotype	90K_map_left (cM) (b)	90K_map_right (cM) (b)	Most significant SNPs				SNP position on the Chinese Spring reference v1
						SNP name	P-value	FDR	SNP type	Chromosome	Position
1al	3795905_1al-4885	3955890_1al-16245	IT	150	156	3955890_1al-16245	4.83e-05	0.010442	imputed	chr1A	592313186
1bl	3838189_1bl-644	RAC875_c46093_492	IT	90	115	2325414_1bl-761	2.98e-05	0.00725475	imputed	chr1B	591512721
2bl	RAC875_rep_c72476	wsnp_JD_c4343_5462565	IT	108	119	GENE-0686_186	1.63e-06	0.00627914	90K iSelect	chr2B	797328314
2bs	5195616_2bs-2214	Tdurum_contig51145_476	IT	25	30	5195616_2bs-2729	0.000508422	0.0428312	imputed	chr2B	17563526
2dl	9878493_2dl-408	tplb0035c15_1393	IT	95	100	BS00012014_51	2.25e-07	0.00627914	90K iSelect	chr2D	638148610
3al	4445500_3al-909	4266765_3al-4659	IT	172	185	4445500_3al-909	0.000539349	0.0428312	imputed	chr3A	739160911
3b	wsnp_Ex_rep_c103892_88739043	IAAV5662	IT	17	23	10406268_3b-2449	1.77e-05	0.00627914	imputed	chr3B	8131701
3b	10439692_3b-5742	10741755_3b-6660	IT	65	73	10741755_3b-6660	0.000410011	0.0373998	imputed	chr3B	571797413
5al	2737951_5al-5747	RAC875_c7291_388	IT	53	86	wsnp_Ra_c5651_9978896	5.63e-06	0.00627914	90K iSelect	chr5A	461489888
5bl	10845281_5bl-381	10760095_5bl-1488	IT	51	147	BS00067797_51	2.6e-05	0.00649911	90K iSelect	chr5B	433534091
6al	Tdurum_contig54796_1427	5828079_6al-3186	IT	91	99	5801261_6al-13652	3.84e-05	0.00881874	imputed	chr6A	584688532
6al	5743455_6al-9003	5755646_6al-8462	IT	100	103	5832834_6al-2906	4.45e-05	0.00999657	imputed	chr6A	583366334
6bl	4377585_6bl-178	4396196_6bl-2833	IT	64	68	4377585_6bl-2421	1.75e-06	0.00627914	imputed	chr6B	454076305
6bs	2983113_6bs-225	3034529_6bs-3671	IT	55	60	BS00023168_51	7.41e-07	0.00627914	imputed	chr6B	130829883
7al	IAAV3025	RAC875_c41659_794	IT	127	136	4557031_7al-9452	9.26e-07	0.00627914	90K iSelect	chr7A	608396753
7bl	6735818_7bl-2365	6722840_7bl_6957	IT	75	79	6741354_7bl-798	7.73e-06	0.00251514	imputed	chr7B	649847980
7bl	6712350_7bl_4399	Tdurum_contig14821	IT	102	108	Kukri_c31628_571	0.000117713	0.0176883	imputed	chr7B	658219627
2bl	7986332_2bl-6031	GENE-0686_186	SV	103	107	7986332_2bl-6031	9.66e-10	3.46e-05	imputed	chr2B	797328414
2dl	9878493_2dl-408	tplb0035c15_1393	SV	95	100	9741473_2dl-960	1.04e-09	3.46e-05	90K iSelect	chr2D	638371145
3b	10423756_3b-4141	10741755_3b-6660	SV	67	73	10423756_3b-4141	2.87e-06	0.0153023	90K iSelect	chr3B	519769415
1bl	3838189_1bl-644	3902145_1bl-4097	SV	95	105	3902145_1bl-3939	3.26e-05	0.0333386	90K iSelect	chr1B	593828775
7bl	6669756_7bl-347	6722840_7bl-6957	SV	98	105	6699173_7bl-4067	2.16e-05	0.0266333	imputed	chr7B	648925544
2as	Kukri_c4698_3401	5257853_2as-6493	SD	6	19	5257853_2as-6493	8.56e-06	0.0109659	imputed	chrUn	11731882
2bl	7976553_2bl-8525	IACX5850	SD	103	107	IACX5850	1.63e-10	2.17e-05	imputed	chr2B	599813154
3b	10733097_3b-2123	10733097_3b-4654	SD	84	88	10733097_3b-2123	3.33e-07	0.00120636	90K iSelect	chr3B	4638641
3b	10507796_3b-3444	wsnp_Ex_c37115_44930934	SD	75	78	wsnp_Ex_c3907_7088011	9.33e-07	0.00225842	imputed	chr3B	737764003
3b	10715492_3b-8481	10571965_3b-2892	SD	82	84	10610013_3b-10863	1.58e-09	4.88e-05	imputed	chr3B	730310539
3dl	6931466_3dl-8426	6954440_3dl-3106	SD	120	130	6951147_3dl-1873	1.98e-06	0.00361062	imputed	chr3D	553287267
5al	2743383_5al-1528	RAC875_c1437_1644	SD	55	60	RAC875_c1437_1644	2.74e-05	0.0286858	imputed	chr5A	488416614
6al	5769813_6al-5803	5832795_6al-9213	SD	77	81	5829560_6al-1856	5.4e-07	0.00138305	90K iSelect	chr6A	454637956
6al	5803912_6al-21577	5792096_6al-818	SD	83	87	5803912_6al-22450	1.5e-06	0.00333031	imputed	chr6A	545123993
6al	Kukri_c18955_73	wsnp_Ex_c28973_38050174	SD	138	142	5797420_6al-10534	2.94e-05	0.0296365	imputed	chr6A	613485201
7as	4243684_7as-9058	4243684_7as-12787	SD	43	47	4243684_7as-9366	8.02e-06	0.0108819	imputed	chr7A	17333538
7bl	6735818_7bl-2365	6642060_7bl-2669	SD	98	109	Kukri_c31628_571	6.04e-07	0.00151772	imputed	chr7B	658219627
a) the left and right boundaries of GWAS intervals are based on locations of the contigs ordered for the developemnt of the wheat haplotype map (Jordan et al., 2015). The contig order could be found on the wheat hapmap project website.
b) marker positions are taken from the consensus map developed using the 90K iSelect assay (Wang et al., 2014)
